# Supplementary material
Source: PubMed Central journal article supplement (PMC7987130)
Supplement: NIHMS1624795-supplement-317439_Major_Resources_Table.pdf [file NIHMS1624795-supplement-317439_Major_Resources_Table.pdf]

## Major Resources Table

### Animals (in vivo studies)

| Species | Vendor or Source       | Background Strain | Sex | Persistent ID / URL |
|---------|------------------------|-------------------|-----|---------------------|
| Mouse   | The Jackson Laboratory | C57BL6/J          | M,F |                     |
|         |                        |                   |     |                     |

### Genetically Modified Animals

|                            | Species                             | Vendor or Source           | Background Strain | Other Information                                          | Persistent ID / URL                                                               |
|----------------------------|-------------------------------------|----------------------------|-------------------|------------------------------------------------------------|-----------------------------------------------------------------------------------|
| Parent - Male              | <i>Mgp</i> <sup>+/-</sup> mouse     | The Jackson Laboratory     | C57BL6/J          | B6.129S7- <i>Mgp</i> <sup>tm1Kry/KbosJ</sup> stock #023811 | <a href="https://www.jax.org/strain/023811">https://www.jax.org/strain/023811</a> |
| Parent - Female            | <i>Mgp</i> <sup>+/-</sup> mouse     | The Jackson Laboratory     | C57BL6/J          | B6.129S7- <i>Mgp</i> <sup>tm1Kry/KbosJ</sup> stock #023811 | <a href="https://www.jax.org/strain/023811">https://www.jax.org/strain/023811</a> |
| Parent - Male              | <i>Mgp</i> <sup>mut/mut</sup> mouse | Investigator Lab (Bostrom) | C57BL6/J          | Mutation of MGP; Proline-64 to Glycine                     |                                                                                   |
| Parent - Female            | <i>Mgp</i> <sup>mut/mut</sup> mouse | Investigator Lab (Bostrom) | C57BL6/J          | Mutation of MGP; Proline-64 to Glycine                     |                                                                                   |
| (Not bred by investigator) | <i>Bmp4</i> <sup>+/-</sup> mouse    | The Jackson Laboratory     | C57BL6/J          | B6.129S2- <i>Bmp4</i> <sup>tm1Blh/J</sup> stock #002612    | <a href="https://www.jax.org/strain/002612">https://www.jax.org/strain/002612</a> |

### Antibodies

| Target antigen  | Vendor or Source | Catalog # | Working concentration | Lot # (preferred but not required) | Persistent ID / URL |
|-----------------|------------------|-----------|-----------------------|------------------------------------|---------------------|
| See Table below |                  |           |                       |                                    |                     |
|                 |                  |           |                       |                                    |                     |

### DNA/cDNA Clones

| Clone Name | Sequence | Source / Repository | Persistent ID / URL |
|------------|----------|---------------------|---------------------|
| N/A        |          |                     |                     |
|            |          |                     |                     |

### Cultured Cells

| Name                                                       | Vendor or Source                                                                               | Sex (F, M, or unknown) | Persistent ID / URL |
|------------------------------------------------------------|------------------------------------------------------------------------------------------------|------------------------|---------------------|
| Human Pulmonary Artery Endothelial Cells (HPAECs), primary | Thermo Fisher Scientific Catalog number:C0085C                                                 | Unknown                |                     |
| Human Aortic Endothelial Cells (HAECs), primary            | Thermo Fisher Scientific Catalog number:C0065C                                                 | Unknown                |                     |
| Human Aortic Endothelial Cells (HAECs), primary            | Prepared by the UCLA Atherosclerosis Research Unit Core from de-identified human aortic tissue | Unknown                |                     |
| Human Saphenous Vein Endothelial Cells (HSVEC), primary    | Promocell Catalog number: C-12231                                                              | Unknown                |                     |
| Human Brain Endothelial Cells (HBECs), immortalized        | ATCC® HBEC-5i (ATCC® CRL-3245™)                                                                | Unknown                |                     |

|                                                                 |                                                                                                   |         |  |
|-----------------------------------------------------------------|---------------------------------------------------------------------------------------------------|---------|--|
| Mouse or Human Dedifferentiated Fat Cells (DFAT cells), primary | Prepared from mouse or de-identified human fat from liposuction by the Investigator Lab (Bostrom) | Unknown |  |
|-----------------------------------------------------------------|---------------------------------------------------------------------------------------------------|---------|--|

#### Data & Code Availability

| Description                  | Source / Repository                         | Persistent ID / URL                     |
|------------------------------|---------------------------------------------|-----------------------------------------|
| Code for Computational Model | Investigators: Drs. Y. Guo and A. Garfinkel | Request from AGarfinkel@mednet.ucla.edu |
|                              |                                             |                                         |

#### Other

| Description                        | Source / Repository                                       | Persistent ID / URL |
|------------------------------------|-----------------------------------------------------------|---------------------|
| <b>Primers and Probes for qPCR</b> | <b>Applied Biosystems; Taqman® Gene Expression Assays</b> |                     |
| Human or mouse ALK1                | Hs00953798 m1; Mm00437432 m1                              |                     |
| Human or mouse ALK2                | Hs00153836 m1; Mm01331069 m1                              |                     |
| Human APLN                         | Hs00175572 m1                                             |                     |
| Human or mouse BMP4                | Hs03676628 s1; Mm00432087 m1                              |                     |
| Human CD34                         | Hs02576480 m1                                             |                     |
| Human or mouse CV-2                | Hs00403062 m1; Mm01175806 m1                              |                     |
| Human DLL4                         | Hs00184092 m1                                             |                     |
| Human or mouse ENG                 | Hs00923996 m1; Mm00468252 m1                              |                     |
| Human HEY1                         | Hs05047713 s1                                             |                     |
| Human JAG1                         | Hs01070032 m1                                             |                     |
| Human or mouse MGP                 | Hs00969490 m1; Mm00485009 m1                              |                     |
| Human VEGF                         | Hs00900055 m1                                             |                     |
|                                    |                                                           |                     |
| <b>Recombinant Proteins</b>        |                                                           |                     |
| BMP-4, human                       | R&D Systems<br>Catalog number:<br>314-BP                  |                     |
| BMP-9, human                       | R&D Systems<br>Catalog number:<br>3209-BP                 |                     |
|                                    |                                                           |                     |
| <b>ELISA</b>                       |                                                           |                     |
| Human BMP-9 DuoSet ELISA           | R&D Systems<br>Catalog number: DY008                      |                     |

| Target Antigen / Antibody                                                 | Reactivity                      | Manufacturer                          | Catalogue Number | Working Concentration    |
|---------------------------------------------------------------------------|---------------------------------|---------------------------------------|------------------|--------------------------|
| <b>Retinal Immunofluorescence</b>                                         |                                 |                                       |                  |                          |
| Alpha-Smooth Muscle Actin                                                 | Mouse anti-Mouse; monoclonal    | R&D Systems                           | MAB1420          | 1:200                    |
| Crossveinless-2 / CV-2                                                    | Goat anti-Mouse; polyclonal     | R&D Systems                           | AF2299           | 1:200                    |
| Activin receptor-like kinase 1 (ALK-1)                                    | Goat anti-Mouse; polyclonal     | R&D Systems                           | AF770            | 1:200                    |
| Matrix Gla protein (MGP)                                                  | Rabbit anti-Mouse; polyclonal   | Abcam                                 | ab192396         | 1:200 (or as titrated)   |
| CD31/PECAM-1                                                              | Goat anti-Mouse; polyclonal     | R&D Systems                           | AF3628           | 1:200                    |
| Endoglin (CD105)                                                          | Rat anti-Mouse; monoclonal      | BD Biosciences                        | 550546           | 1:200                    |
| Griffonia Simplicifolia Lectin I (GSL I) isolectin B4 (IB4), biotinylated | Galactose                       | Vector Labs                           | B-1205           | 1:200                    |
| Isotype control Mouse IgG                                                 |                                 | Millipore Sigma                       | NI03             | 1:250                    |
| Isotype control Rabbit IgG                                                |                                 | Abcam                                 | ab171870         | 1:500                    |
| Isotype control Goat IgG                                                  |                                 | Abcam                                 | ab37373          | 1:200                    |
| Isotype control Rat IgG                                                   |                                 | Thermo Fisher Scientific              | 02-9602          | 1:500                    |
| <b>Secondary Antibodies for Immunofluorescence</b>                        |                                 |                                       |                  |                          |
| Chicken anti-Goat IgG secondary antibody, Alexa Fluor 594                 | Chicken anti-Goat; polyclonal   | Invitrogen / Thermo Fisher Scientific | A-21468          | 1:500-1,000              |
| Chicken anti-Rabbit IgG secondary antibody, Alexa Fluor 594               | Chicken anti-Rabbit; polyclonal | Invitrogen / Thermo Fisher Scientific | A-21442          | 1:500-1,000              |
| Chicken anti-Rabbit IgG secondary antibody, Alexa Fluor 488               | Chicken anti-Rabbit; polyclonal | Invitrogen / Thermo Fisher Scientific | A-21441          | 1:500-1,000              |
| Chicken anti-Goat IgG secondary antibody, Alexa Fluor 488                 | Chicken anti-Goat; polyclonal   | Invitrogen / Thermo Fisher Scientific | A-21467          | 1:500-1,000              |
| Chicken anti-Mouse IgG secondary antibody, Alexa Fluor 488                | Chicken anti-Mouse; polyclonal  | Invitrogen / Thermo Fisher Scientific | A-21200          | 1:500-1,000              |
| Streptavidin, Alexa Fluor™ 594 conjugate                                  |                                 | Thermo Fisher Scientific              | S11227           | 1:500                    |
| Streptavidin, Alexa Fluor™ 350 conjugate                                  |                                 | Thermo Fisher Scientific              | S11249           | 1:500                    |
| <b>Immunoblotting</b>                                                     |                                 |                                       |                  |                          |
| Crossveinless-2 / CV-2                                                    | Goat anti-Mouse; polyclonal     | R&D Systems                           | AF2299           | 1:5,000                  |
| Matrix Gla protein (MGP)                                                  | Rabbit anti-Mouse; polyclonal   | Abcam                                 | ab192396         | 1:2,000 (or as titrated) |
| Beta (β)-Actin                                                            | Mouse anti-mouse; monoclonal    | Sigma-Aldrich                         | A2228            | 1:5,000                  |
| <b>Secondary Antibodies for Immunofluorescence</b>                        |                                 |                                       |                  |                          |
| Secondary antibody, HRP                                                   | Rabbit anti-Goat IgG (H+L)      | Thermo Fisher Scientific              | 31402            | 1:5,000                  |
| Secondary antibody, HRP                                                   | Goat anti-Rabbit IgG (H+L)      | Thermo Fisher Scientific              | 31460            | 1:5,000                  |
| Secondary antibody, HRP                                                   | Goat anti-Mouse IgG (H+L)       | Thermo Fisher Scientific              | 31430            | 1:5,000                  |
