# Supplementary material
Source: PubMed Central journal article supplement (PMC7987130)
Supplement: NIHMS1624795-supplement-317439_Uncut_Gel_Blot.pdf [file NIHMS1624795-supplement-317439_Uncut_Gel_Blot.pdf]

CV2 Immunoblot

CV2

01/2018

HPAEC + B9

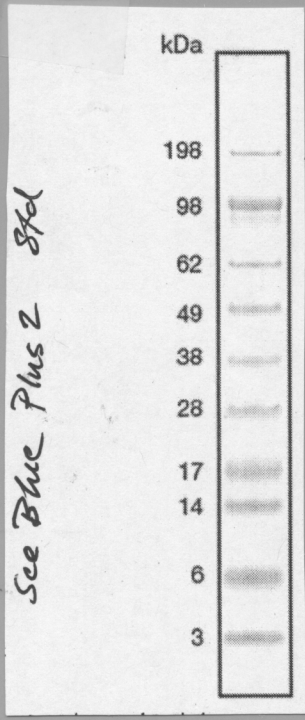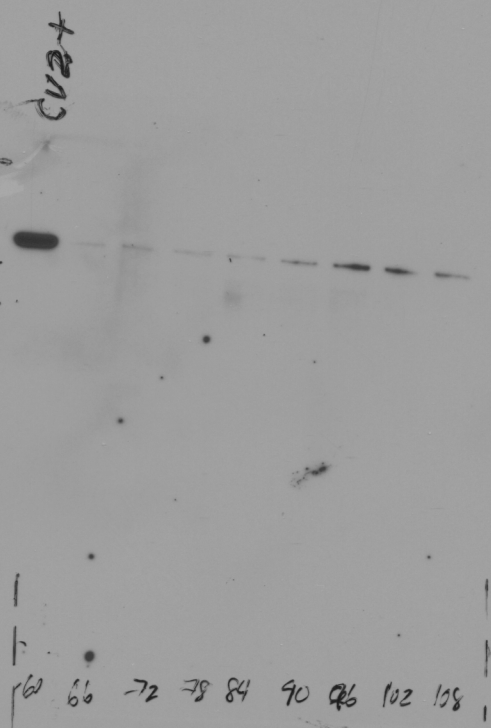

Used for Figure 2B

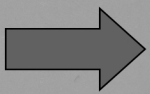

# MGP Immunoblot

IPAEU 1039 964

Used for Figure 2B

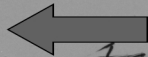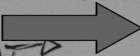

188 -  
62 -  
41 -  
38 -  
28 -  
14 -  
6 -

mgt  
1 2 3

28

14

6

60 66 72

78 84 90 96 102 108 114

MGP 10 kDa

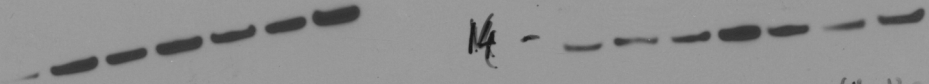

$\beta$ -Actin Immunoblot

See Blue Plus 2  
(Thermo Fisher Scientific)

kDa

198  
98  
62  
49  
38  
28  
17  
14  
6  
3

for  
WAP  
1 2 3

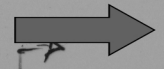

Used for Figure 2B

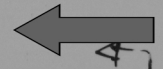

60 66 72 78 84

90 96 102 108 114

62

62

(2) WB of  $\beta$  Actin

BRP9 treated
